# Supplementary material for: In situ decoration of plasmonic Ag nanocrystals on the surface of (BiO)2CO3 hierarchical microspheres for enhanced visible light photocatalysis
Source: Royal Society of Chemistry journal article supplement (doi:10.1039/c4dt00427b), 2014-01-01
Supplement: c4dt00427b1.pdf [file c4dt00427b1.pdf]

**Supporting Information for**  
**In situ decoration of plasmonic Ag nanocrystals on the surface of**  
**(BiO)<sub>2</sub>CO<sub>3</sub> hierarchical microspheres for enhanced visible light**  
**photocatalysis**

Fan Dong <sup>a,\*</sup>, Qiuyan Li <sup>a</sup>, Ying Zhou <sup>b</sup>, Yanjun Sun <sup>a</sup>, Haidong Zhang <sup>a</sup>, Zhongbiao  
Wu <sup>c</sup>

<sup>a</sup> Chongqing Key Laboratory of Catalysis and Functional Organic Molecules, College of Environmental and Biological Engineering, Chongqing Technology and Business University, Chongqing, 400067, China.

<sup>b</sup> State Key Laboratory of Oil and Gas Reservoir and Exploitation, School of Materials Science and Engineering, Southwest Petroleum University, Chengdu, 610500, China.

<sup>c</sup> Department of Environmental Engineering, Zhejiang University, Hangzhou, 310027, China.

To whom correspondence should be addressed. E-mail: dfctbu@126.com

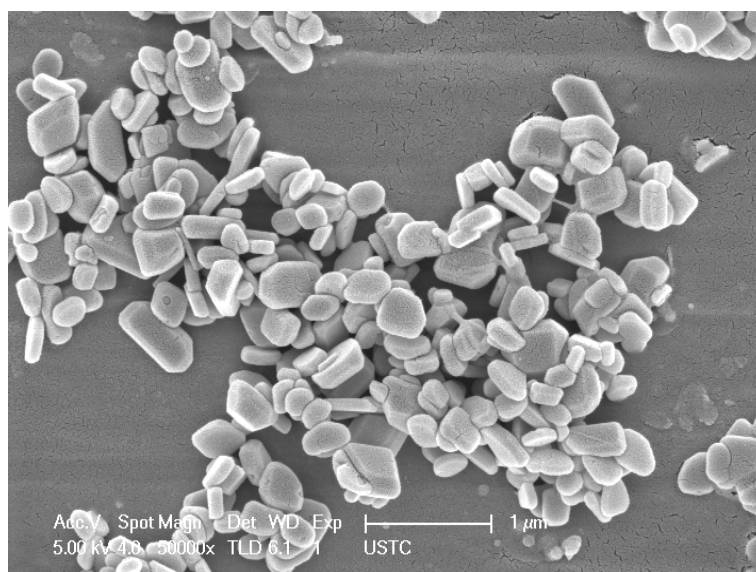

Fig. S1 SEM image of BOC sample with nanosheet morphology.

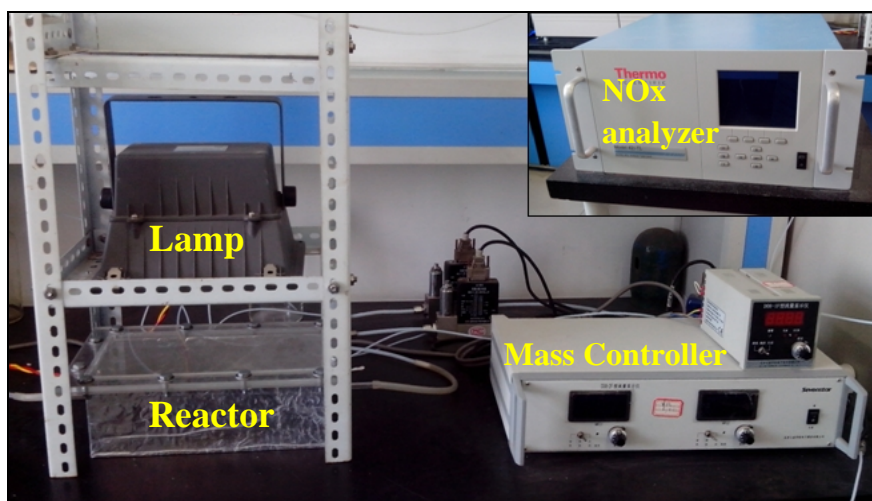

Fig. S2 The photo of the reactor system (inset shows the Chemiluminescence NO<sub>x</sub> analyzer, Thermo Environmental Instruments Inc., 42i-TL).

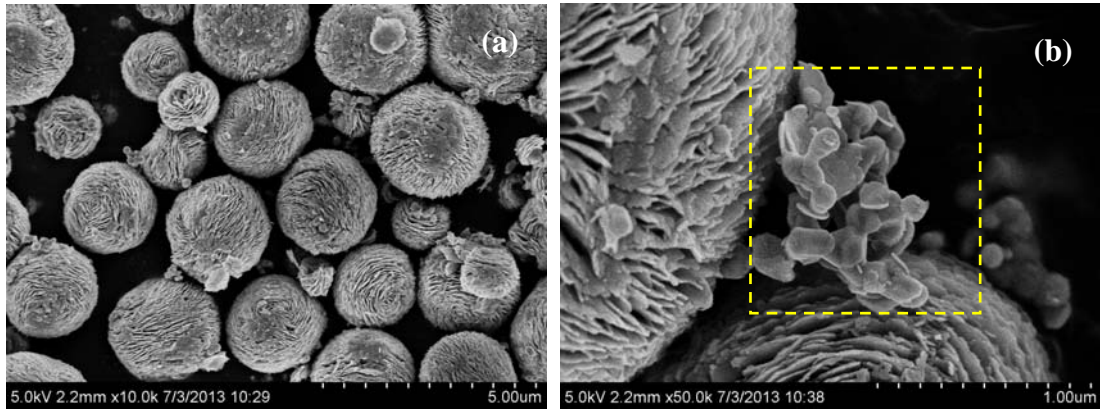

Fig. S3 SEM images of Ag/BOC-20%.
